# Supplementary material for: MOF-derived lithiophilic CuO nanorod arrays for stable lithium metal anodes
Source: Royal Society of Chemistry journal article supplement (doi:10.1039/d0nr01091j), 2020-01-01
Supplement: d0nr01091j1.pdf [file d0nr01091j1.pdf]

## Electronic supplementary information

### MOF-derived lithiophilic CuO nanorod arrays for stable lithium metal anode

*Lei Wei,<sup>a</sup> Li Li,<sup>a,b</sup> Teng Zhao,<sup>\*a</sup> Nanxiang Zhang,<sup>a</sup> Yuanyuan Zhao,<sup>a</sup> Feng Wu<sup>a,b</sup> and Renjie Chen<sup>\*a,b</sup>*

- a. School of Materials Science & Engineering, Beijing Institute of Technology, Beijing 100081, China.
- b. Collaborative Innovation Center of Electric Vehicles in Beijing, Beijing 100081, China.

E-mail address: chenrj@bit.edu.cn (R. Chen); tz270@bit.edu.cn.

## Supplementary figures

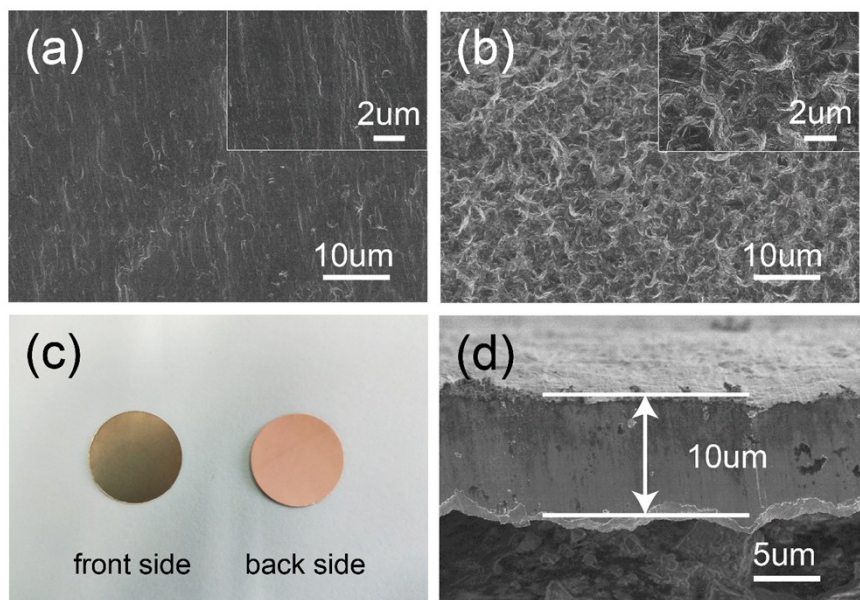

**Fig. S1** Top view SEM images of planar Cu foil (a) front side (b) back side. (c) Digital photograph of planar Cu foil. (d) Cross-section SEM image of bare Cu foil. The thickness of Cu foil is about 10 μm. The inset of (a) and (b) show the high magnification images.

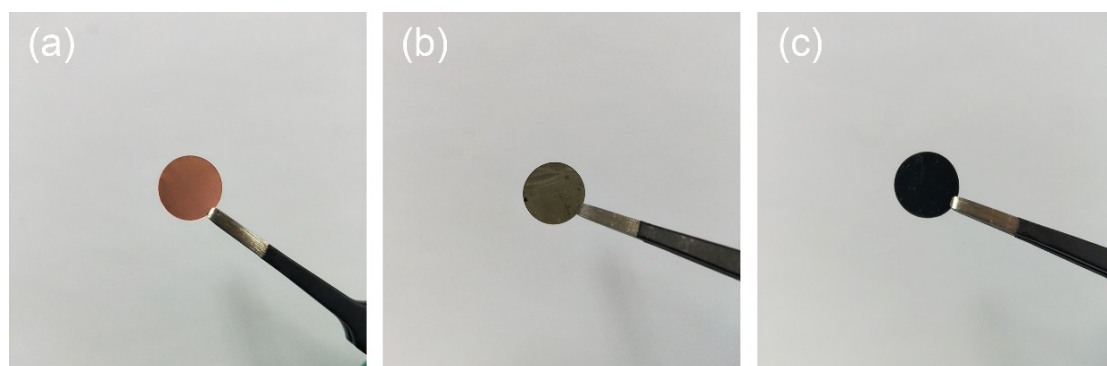

**Fig. S2** Optical images of the color changes for bare Cu foil during the synthesis process. (a) Planar Cu. (b) Cu-TCNQ/CF. (c) CuO NAs/CF

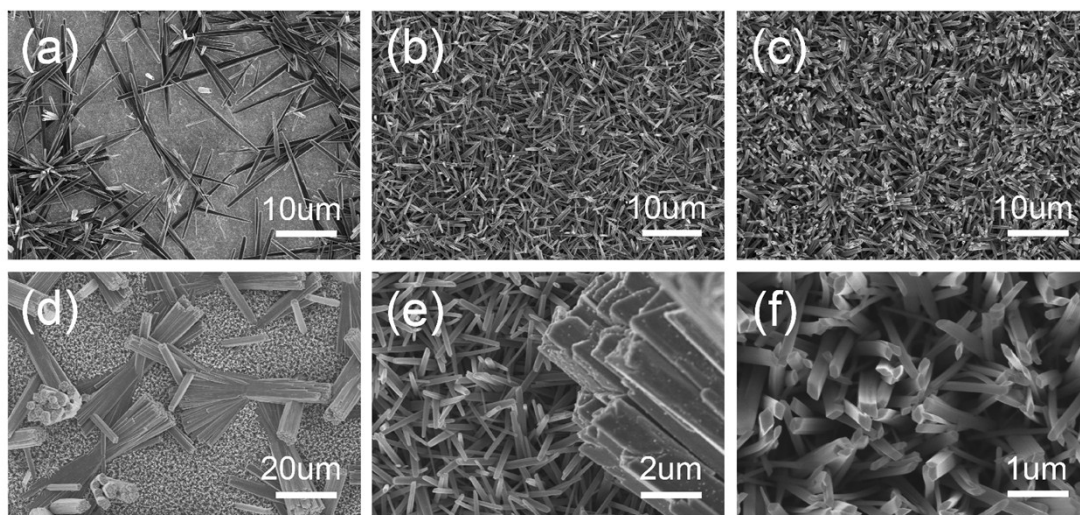

**Fig. S3** SEM images of Cu-TCNQ/CF in a concentration of 0.5mM TCNQ acetonitrile solution with different reaction times. (a) 6h (b) 12h (c) 24h. SEM images of Cu-TCNQ/CF in a concentration of 1mM TCNQ acetonitrile solution with (d-e) 6h (f) 12h.

(a)

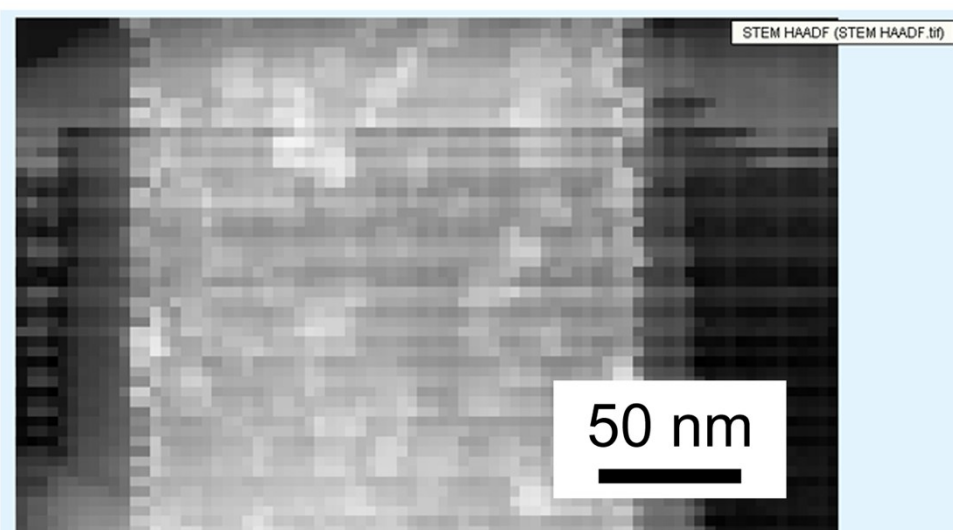

(b)

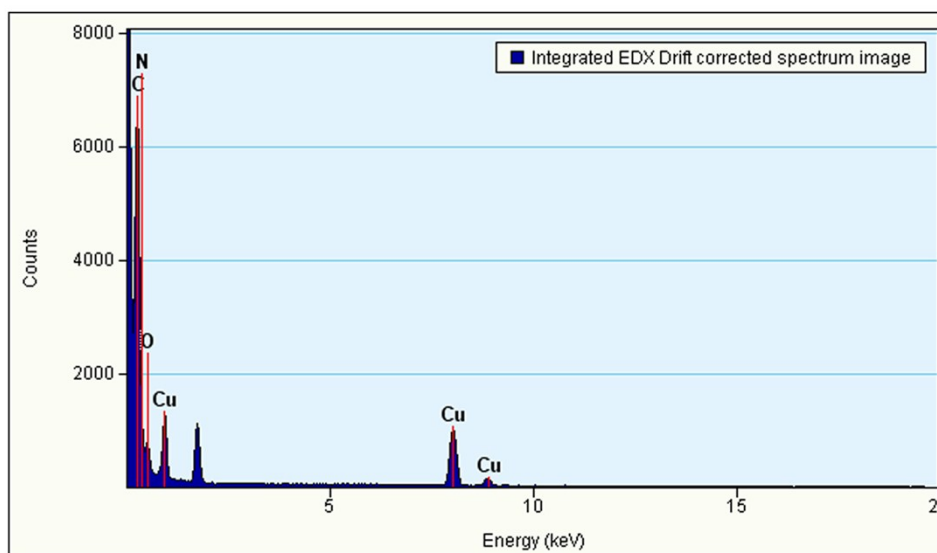

**Fig. S4** The selected area of TEM images about EDX mapping (a) and corresponding energy dispersive X-ray spectra (EDS) analysis (b) related to Fig. 2f.

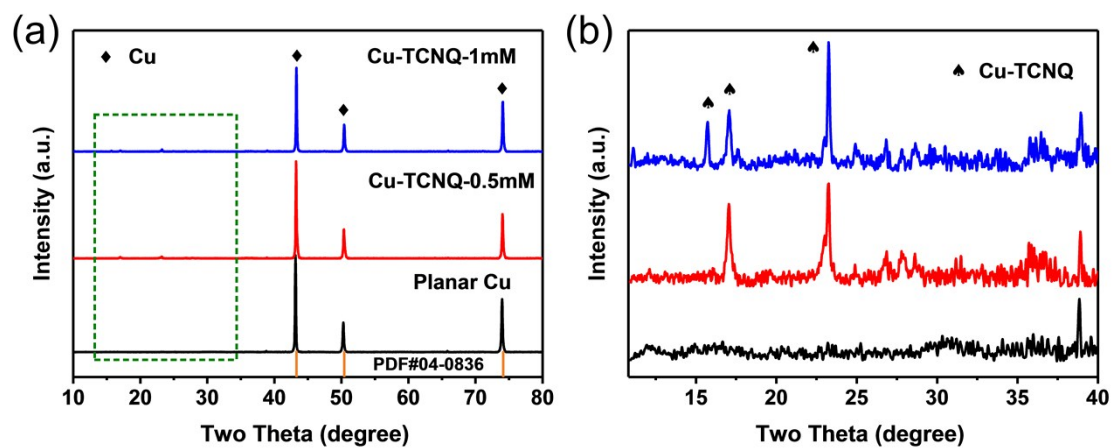

**Fig. S5** (a) XRD pattern of planar Cu foil and Cu-TCNQ/CF with different concentration of TCNQ acetonitrile solution. (b) Enlarge pattern of the green dotted box.

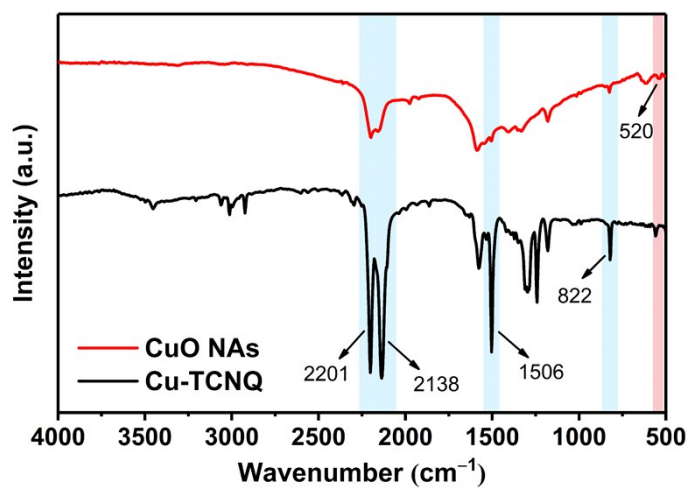

**Fig. S6** FT-IR spectra of Cu-TCNQ and CuO NAs.

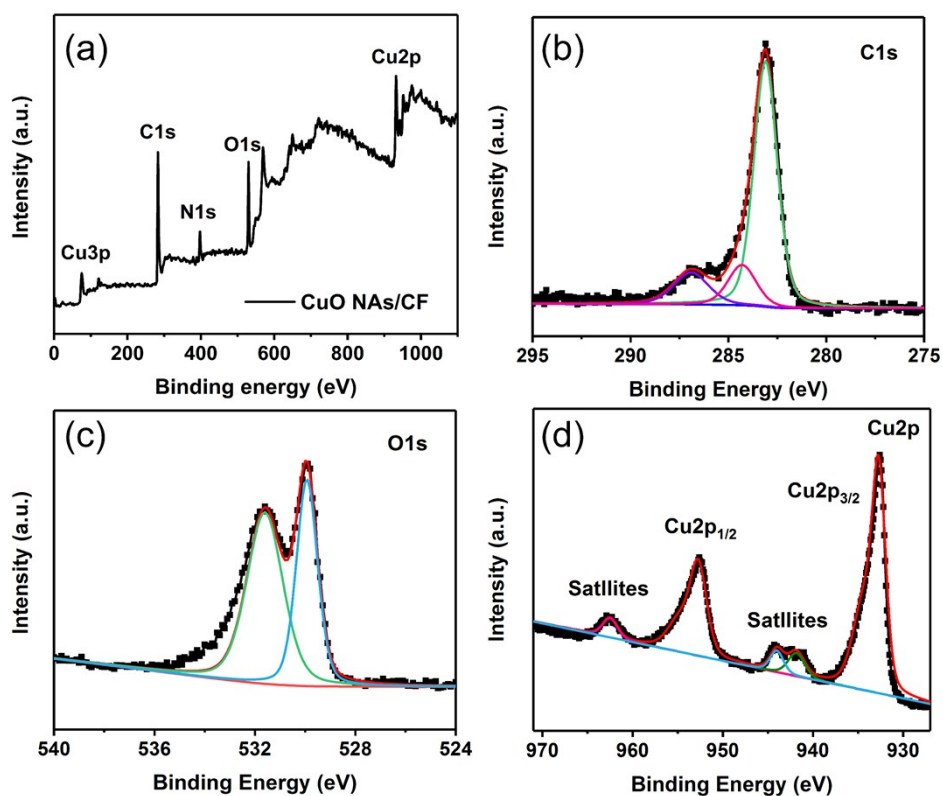

**Fig. S7** XPS and corresponding high resolution spectra of (a) CuO NAs/CF, (b) C1s (c) O1s, (d) Cu2p.

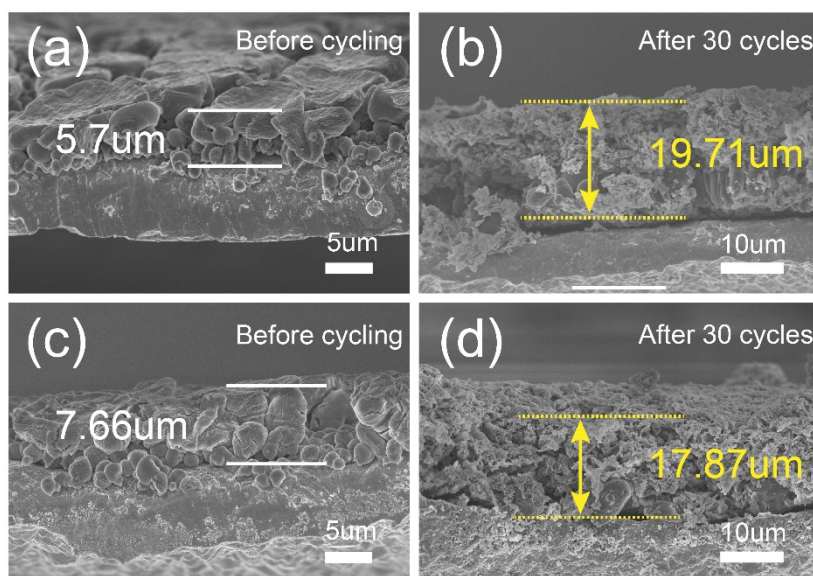

**Fig. S8** Cross-section SEM images of Li deposited on bare foil (a, b) and CuO NAs/CF (c, d).

Before cycling (a, c), after 30<sup>th</sup> cycles (b, d).

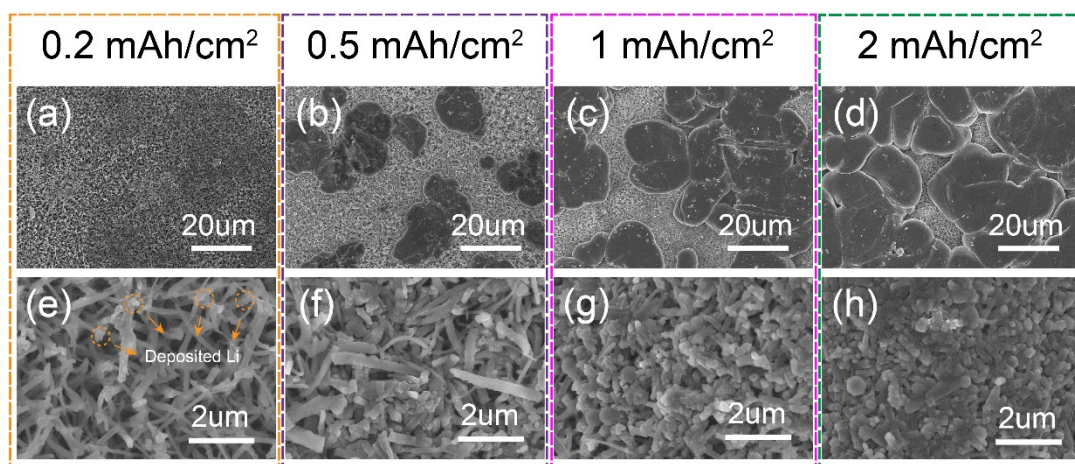

**Fig. S9** Top view SEM images of Li deposited morphologies on CuO NAs/CF current collector with different amounts of Li deposition capacities at  $1 \text{ mA cm}^{-2}$ . (a, e)  $0.2 \text{ mA h cm}^{-2}$ , (b, f)  $0.5 \text{ mA h cm}^{-2}$ , (c, g)  $1 \text{ mA h cm}^{-2}$ , (d, h)  $2 \text{ mA h cm}^{-2}$ . The deposited Li were labeled by orange arrows.

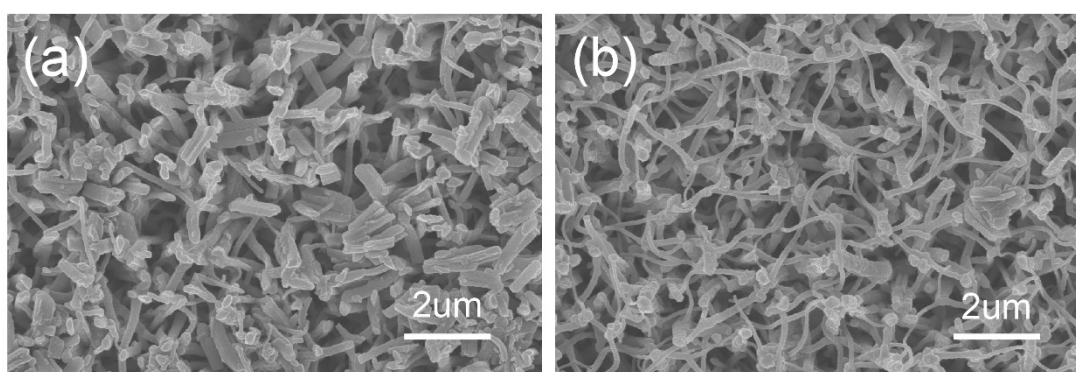

**Fig. S10** Top view SEM images of Li deposited on CuO NAs/CF current collector after 10 cycles.

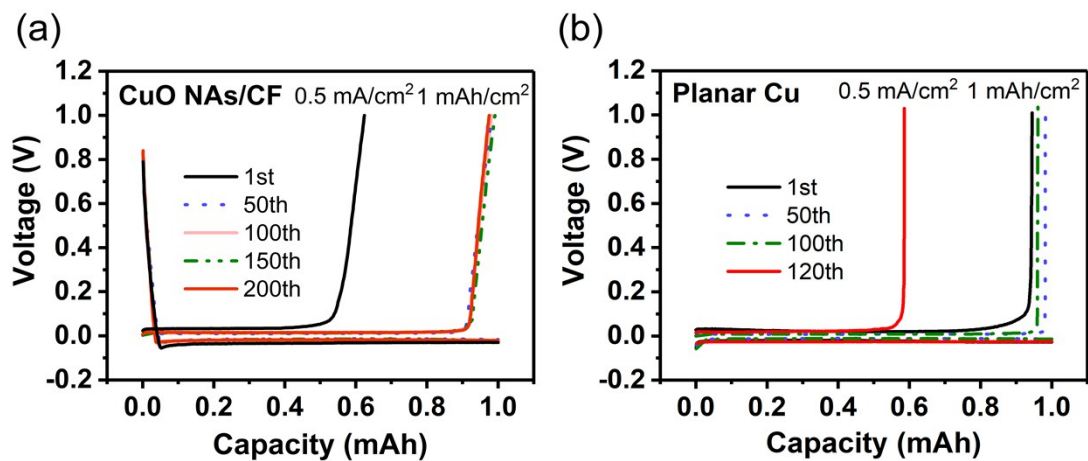

**Fig. S11** Voltage-capacity curves of Li plating/stripping process on (a) CuO NAs/CF and (b) planar Cu foil current collector at  $0.5 \text{ mA cm}^{-2}$  for  $1 \text{ mA h cm}^{-2}$  of Li.

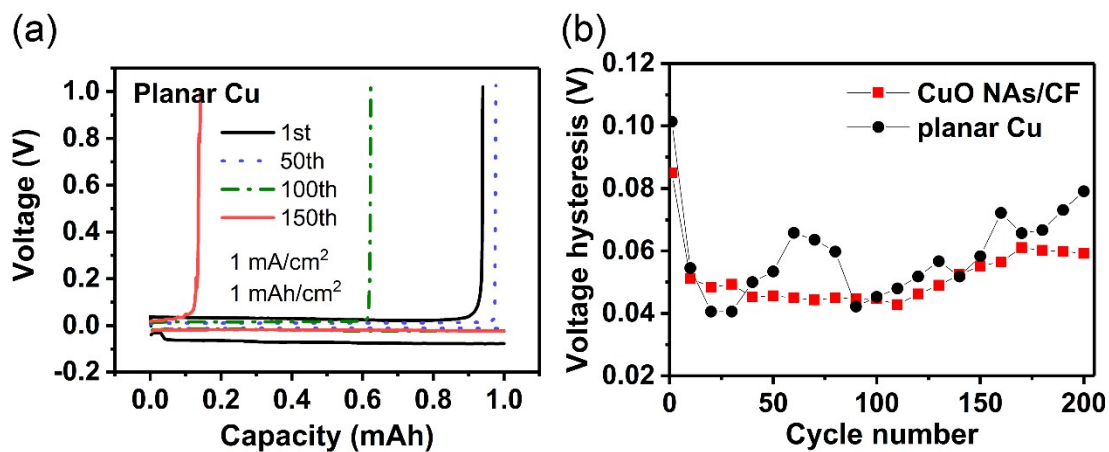

**Fig. S12** (a) The voltage-capacity curves of Li plating/stripping process at various cycles under  $1 \text{ mA/cm}^2$  for a total capacity of  $1 \text{ mA h cm}^{-2}$  Li. (b) Comparison of voltage hysteresis for 200 cycles at a current density of  $1 \text{ mA cm}^{-2}$ .



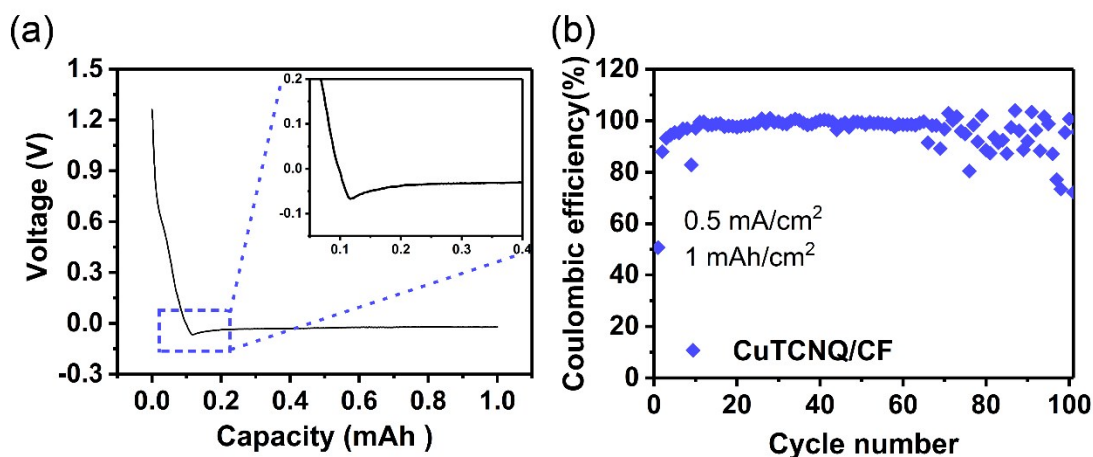

**Fig. S13** (a) Voltage profiles of Li nucleation on Cu-TCNQ/CF current collector at a current density of  $0.5 \text{ mA cm}^{-2}$ . (b) Coulombic efficiency of Cu-TCNQ/CF current collector at  $0.5 \text{ mA cm}^{-2}$  with a total capacity of  $1 \text{ mA h cm}^{-2}$ .

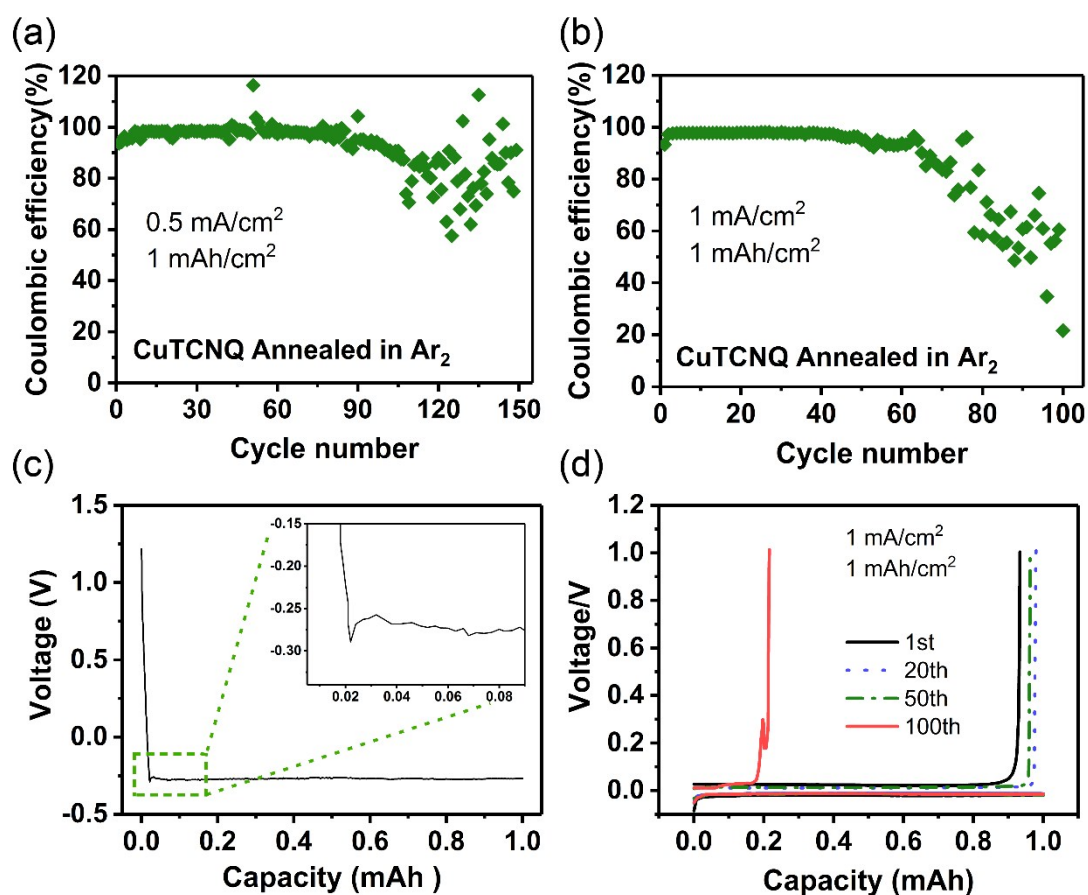

**Fig. S14** Coulombic efficiency of cells using the current collector that Cu-TCNQ/CF annealed in  $\text{Ar}_2$  with  $1 \text{ mA h cm}^{-2}$  at a current density of (a)  $0.5 \text{ mA cm}^{-2}$ , (b)  $1 \text{ mA cm}^{-2}$ . (c) Voltage profiles of Li nucleation on the current collector at  $0.5 \text{ mA cm}^{-2}$ . (d) The corresponding voltage-capacity

curves of Li plating/stripping process at  $1 \text{ mA cm}^{-2}$  for  $1 \text{ mA h cm}^{-2}$  of Li.

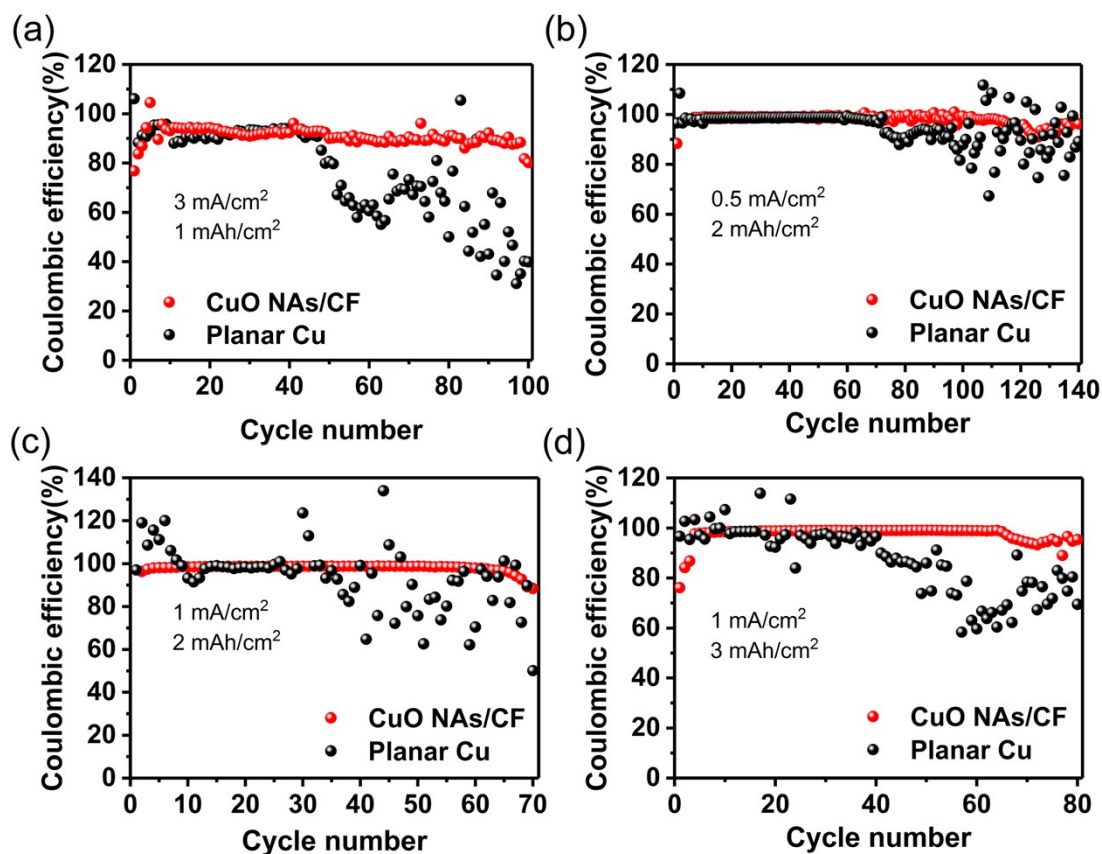

**Fig. S15** (a) Coulombic efficiency of CuO NAs/CF and planar Cu foil current collector with  $1 \text{ mA h cm}^{-2}$  capacity at a current density of  $3 \text{ mA cm}^{-2}$ . Coulombic efficiencies of two current collectors with a capacity of  $2 \text{ mA h cm}^{-2}$  at (b)  $0.5 \text{ mA cm}^{-2}$ , (c)  $1 \text{ mA cm}^{-2}$ . (d) Coulombic efficiency of two current collectors with a capacity of  $3 \text{ mA h cm}^{-2}$  at  $1 \text{ mA cm}^{-2}$ .

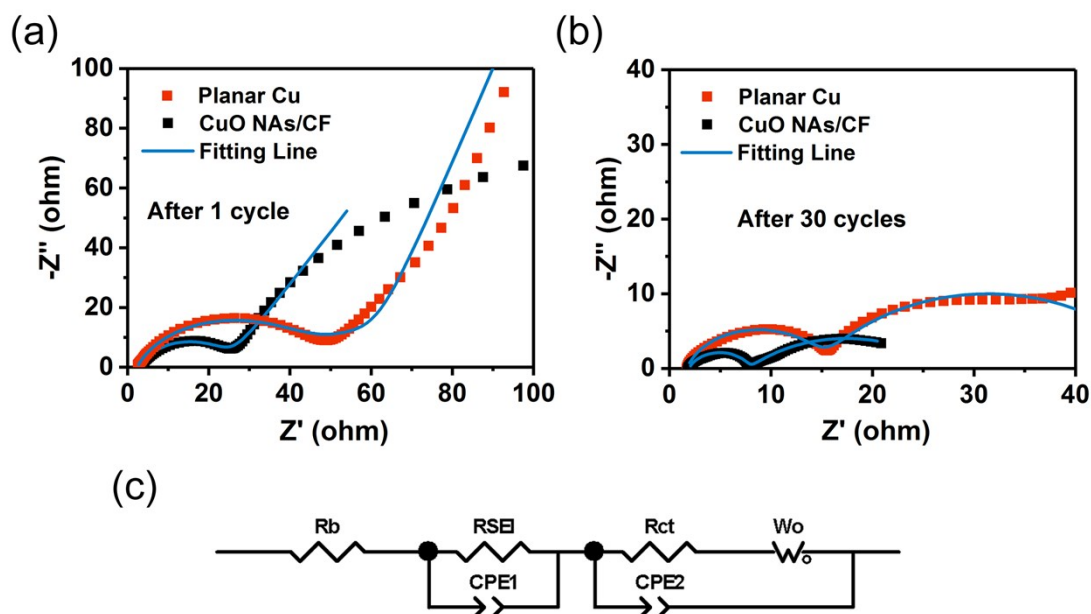

**Fig. S16** Electrochemical impedance spectra (EIS) of Planar Cu foil and CuO NAs/CF after (a) 1st cycle (b) 30th cycles. (c) Equivalent circuit diagram for EIS plots in (a) and (b).

In addition, the electrochemical impedance was also fitted with Z-View software and the fitted parameters were shown in Table S1. It is shown that the bulk resistance ( $R_b$ ) increases after cycling. The charge transfer resistance ( $R_{ct}$ ) for the CuO NAs/CF is about  $24.21 \Omega$  after the 1st cycle and then decreases to  $19.24 \Omega$  after the 30th cycles, much lower than that of the planar Cu.

**Table S1.** Electrochemical impedance fitted parameters for **Figure S16** (a) and (b) with an equivalent circuit model.

|           | Planar Cu      |                    |                   | CuO NAs/CF     |                    |                   |
|-----------|----------------|--------------------|-------------------|----------------|--------------------|-------------------|
|           | $R_b (\Omega)$ | $R_{SEI} (\Omega)$ | $R_{ct} (\Omega)$ | $R_b (\Omega)$ | $R_{SEI} (\Omega)$ | $R_{ct} (\Omega)$ |
| 1 cycle   | 1.561          | -                  | 44.19             | 1.748          | -                  | 24.21             |
| 30 cycles | 1.709          | 13.18              | 33.2              | 1.913          | 5.899              | 19.24             |

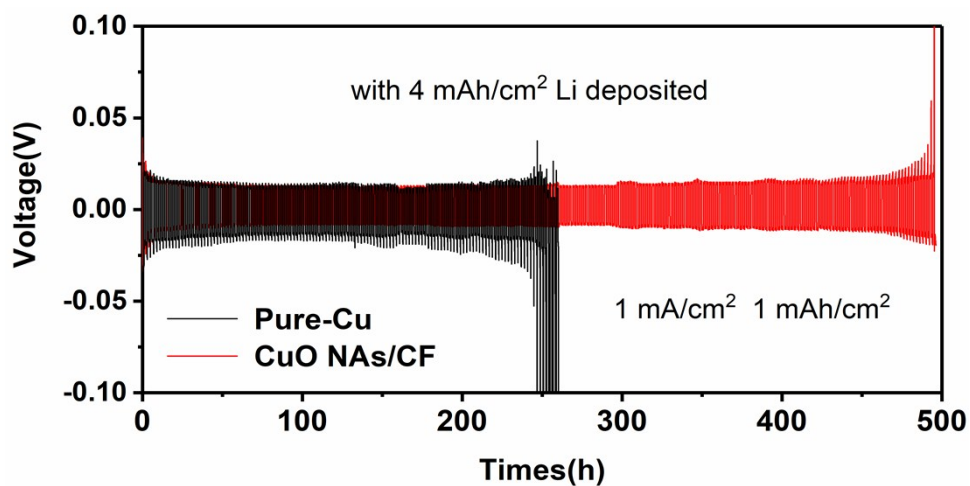

**Fig. S17** Voltage-time profiles of the symmetric cells for Li plating or stripping at  $1 \text{ mA cm}^{-2}$  for  $1 \text{ mA h cm}^{-2}$  with  $4 \text{ mA h cm}^{-2}$  pre-deposited Li.

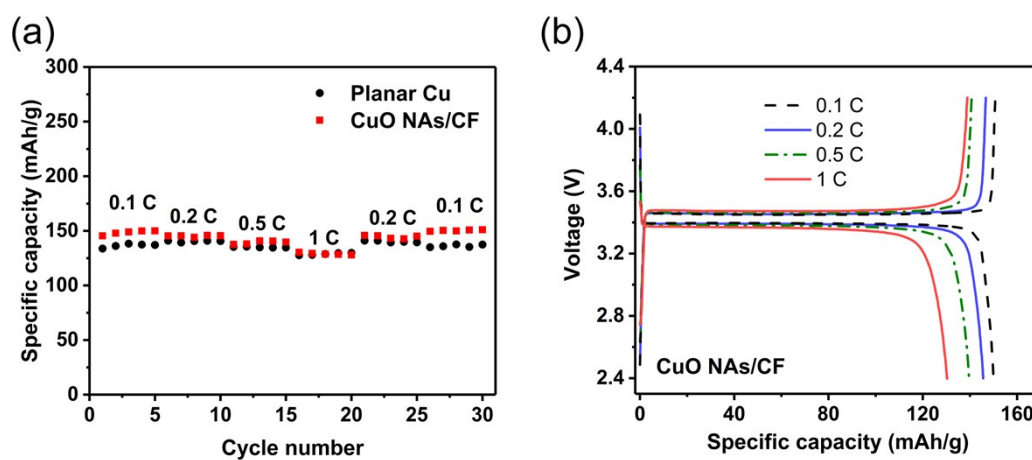

**Fig. S18** (a) The rate performance of  $\text{LiFePO}_4$  full cells using planar Cu foil and CuO NAs/CF. (b) Charge-discharge curves of the Li-CuO NAs/CF||LFP full cells cycled at various C rates between 0.1 and 1C.

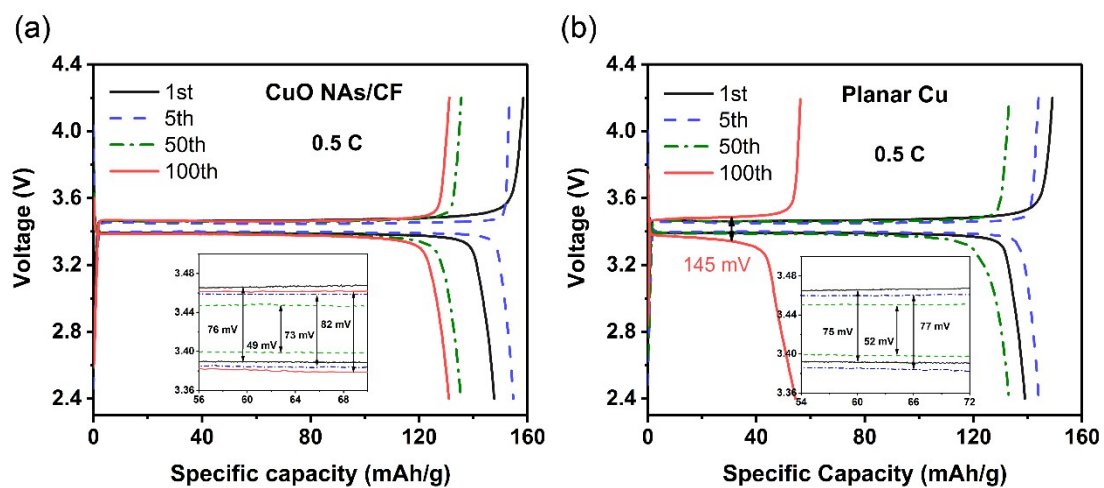

**Fig. S19** Typical galvanostatic charge-discharge profiles of the CuO NAs/CF||LFP and Li-Cu||LFP full cells at 0.5C.
